# Supplementary material
Source: PubMed Central journal article supplement (PMC4185351)
Supplement: cr2014127x1.pdf [file cr2014127x1.pdf]

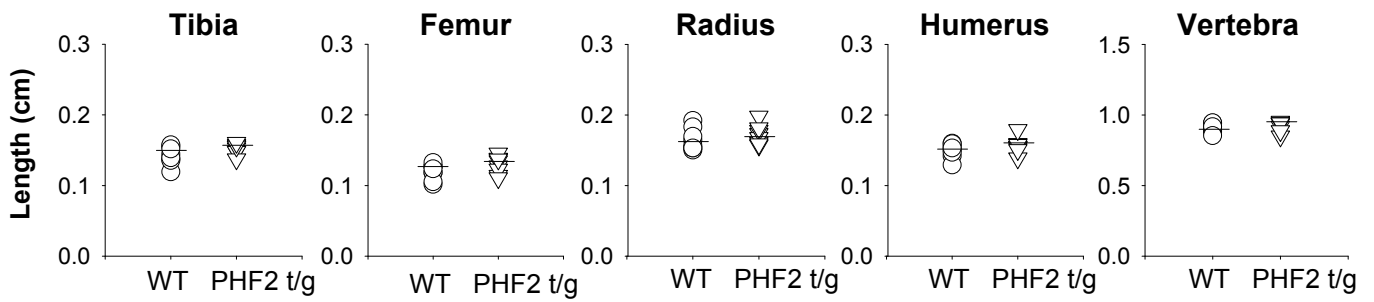

**Supplemental Figure 1.** Based on micro-CT images, length of tibia, femur, radius humerus and vertebra in PHF2-t/g mice and their littermates on P1 was analyzed using the software Amira version 5.4.1. Horizontal bars represent mean values.
