# Supplementary material
Source: PubMed Central journal article supplement (PMC4185351)
Supplement: cr2014127x2.pdf [file cr2014127x2.pdf]

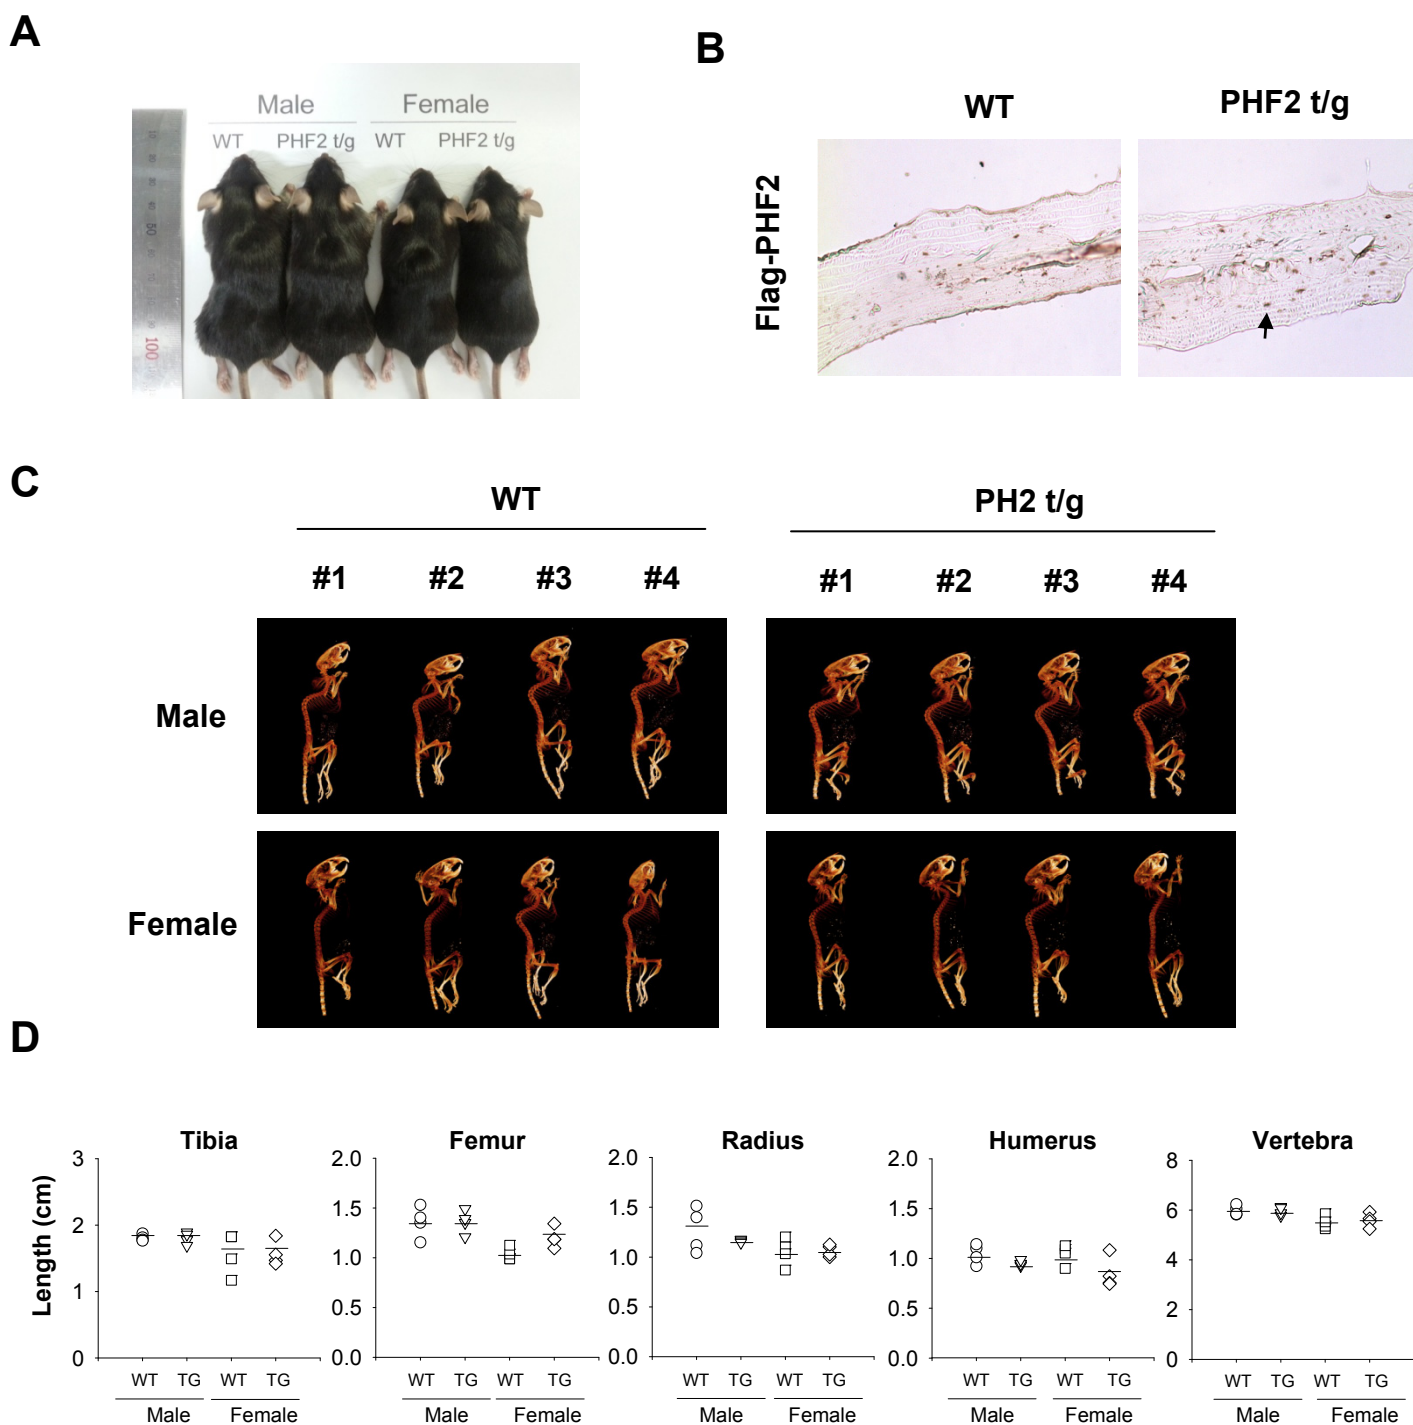

**Supplemental Figure 2.** (A) Representative gross appearances of 3 months old PHF2-t/g and wild-type mice. (B) The expression of Flag-PHF2 in calvarias of 3 months old mice was detected by immunohistochemistry with anti-Flag antibody. An arrow indicates a Flag-PHF2 expressing cell. (C) Micro-CT images of mice (D) Based on micro-CT images, the lengths of tibia, femur, radius humerus, and vertebra were analyzed using the software Amira version 5.4.1. Horizontal bars represent mean values.
