# Supplementary material
Source: PubMed Central journal article supplement (PMC4185351)
Supplement: cr2014127x3.pdf [file cr2014127x3.pdf]

**A**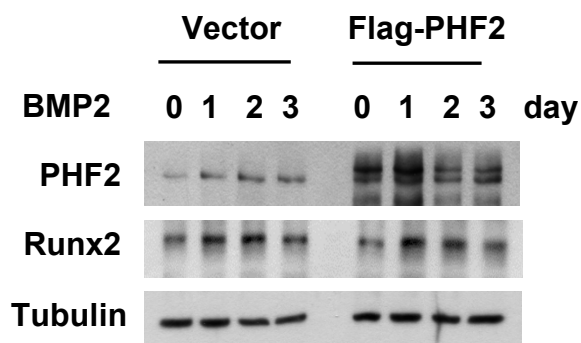**B**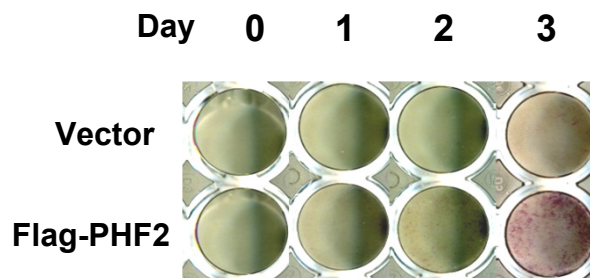**C**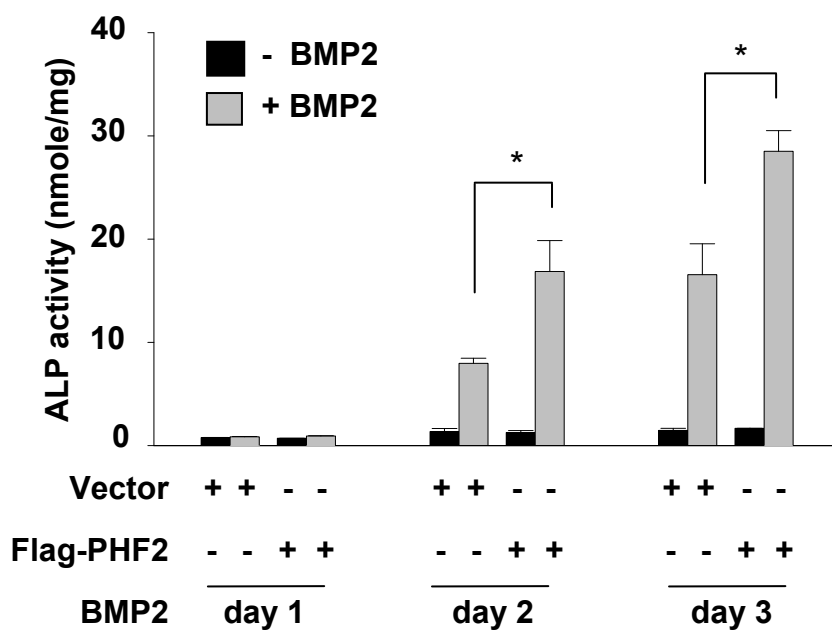

**Supplemental Figure 3.** C2C12 cells, which had been transfected with Flag vector or Flag-PHF2, were treated with BMP2 for indicated time. PHF2 and Runx2 expressions were checked by immunoblotting (A). Osteoblast differentiation was evaluated by staining ALP (B) or by measuring ALP activity (C).
