# Supplementary material
Source: PubMed Central journal article supplement (PMC4185351)
Supplement: cr2014127x5.pdf [file cr2014127x5.pdf]

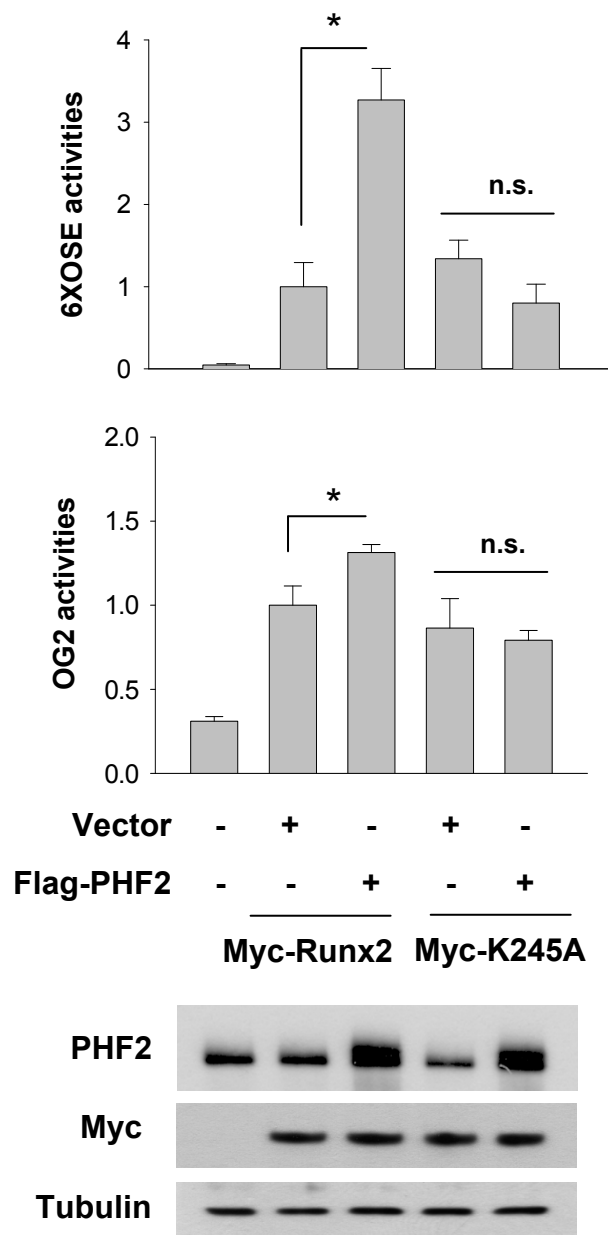

**Supplemental Figure 5.** C2C12 cells were co-transfected with Myc-Runx2 (or its K245A mutant), 6xOSE or OG2 promoter luciferase, Flag-PHF2, and  $\beta$ -gal plasmids. Protein levels were analyzed with immunoblotting (bottom panel). Results (luciferase/ $\beta$ -gal) are presented as the relative values to the vector control. Bars represent the means + SDs (n = 4). \*, P < 0.05; n.s., P > 0.05.
