# Supplementary material
Source: PubMed Central journal article supplement (PMC4185351)
Supplement: cr2014127x6.pdf [file cr2014127x6.pdf]

**A**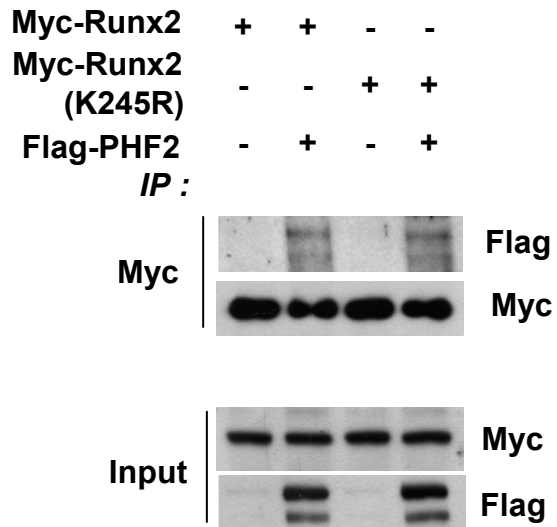**B**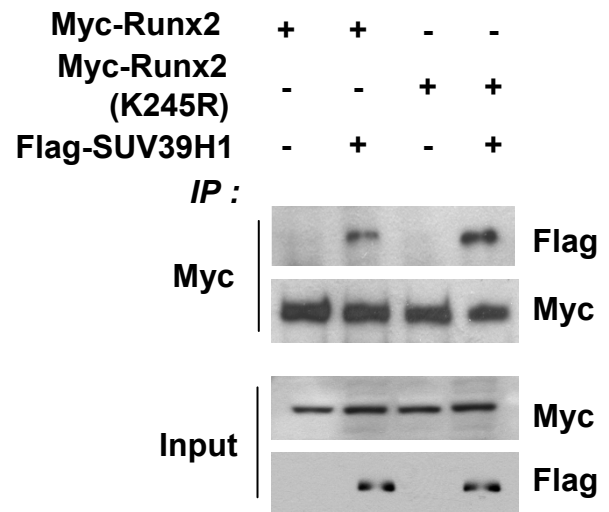

**Supplemental Figure 6.** C2C12 cells were transfected with Myc-Runx2 (or its K245R mutant) and Flag-PHF2 (A) or Flag-SUV39H1 (B) plasmids. Cell extracts were immunoprecipitated with anti-Myc beads, and coprecipitated Flag-PHF2 or Flag-SUV39H1 was immunoblotted.
