# Supplementary material
Source: PubMed Central journal article supplement (PMC4185351)
Supplement: cr2014127x7.pdf [file cr2014127x7.pdf]

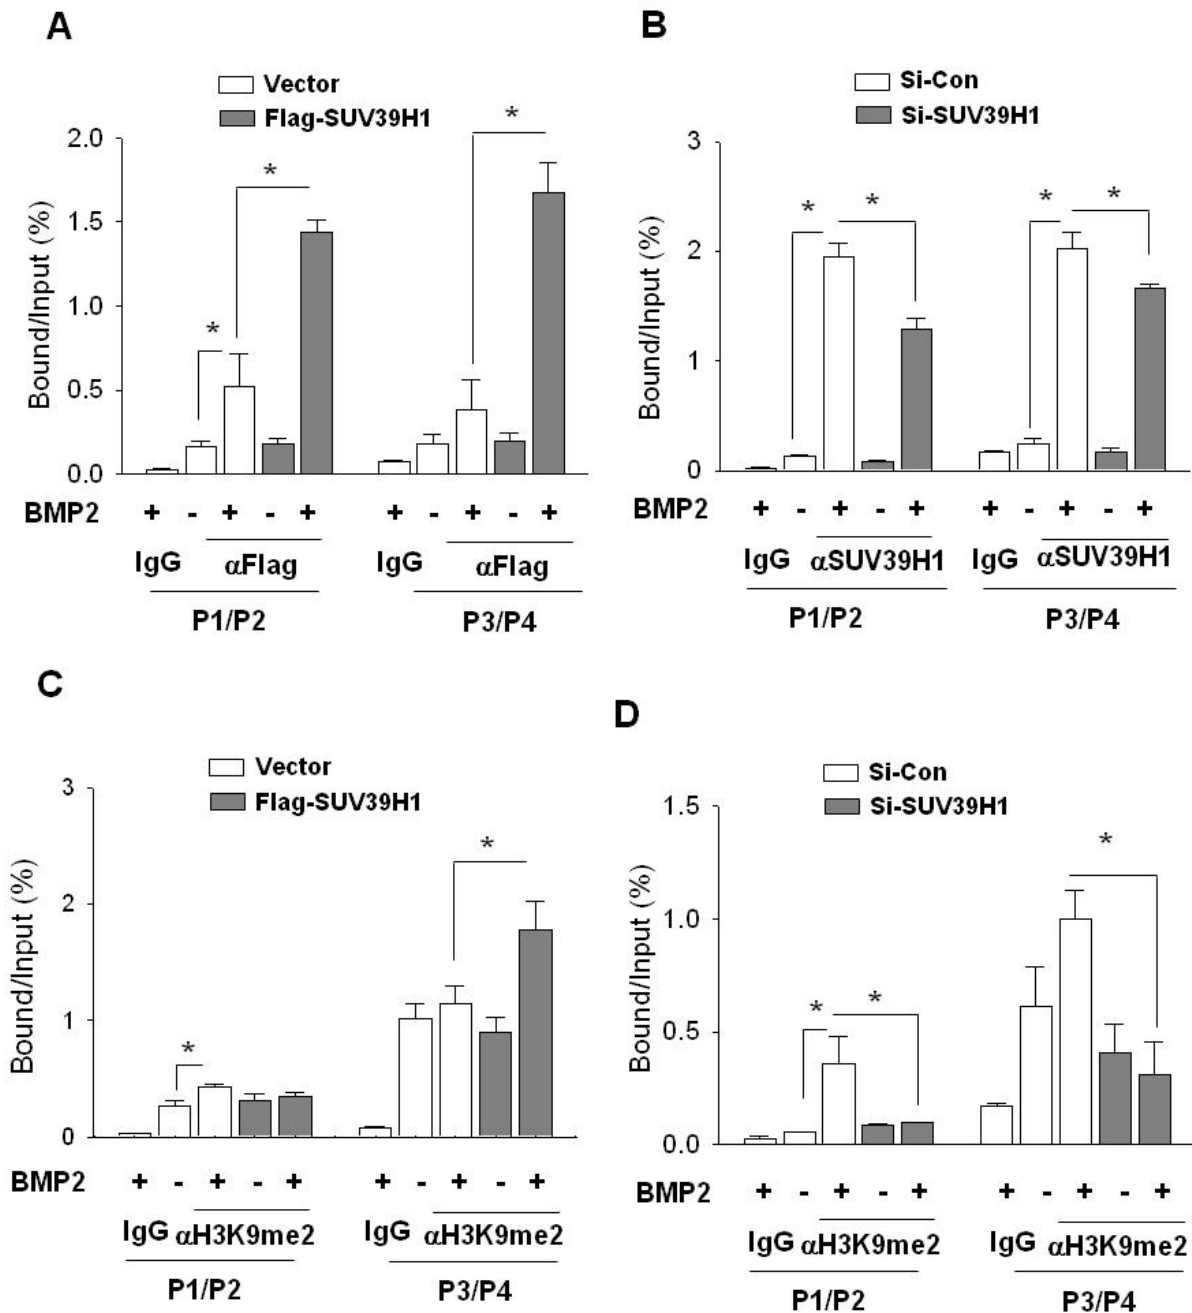

**Supplemental Figure 7.** C2C12 cells were transfected with SUV39H1 plasmid or siRNA, and treated with BMP2 for 2 days. (A, B) ChIP was performed to identify the binding of Flag-SUV39H1 or endogenous SUV39H1 to the OCN promoter. Precipitated DNA segments were quantified by RT-qPCR. (C, D) ChIP was done three times with anti-H3K9me2 antibody. The results (means + SDs, n = 3) are expressed as percentages of the input level.
