# Supplementary material
Source: PubMed Central journal article supplement (PMC4185351)
Supplement: cr2014127x8.pdf [file cr2014127x8.pdf]

**Supplementary information, Table S1** Nucleotide sequences of RNAs and primers used in experiments

| Purposes | Targets               | Sequences (5' to 3')                                              |                                   |
|----------|-----------------------|-------------------------------------------------------------------|-----------------------------------|
| shRNAs   | Non-targeting control | CTAGCAAAAACGCTGAGTACTTCGAAATGTCCTCGAGG<br>ACATTTTCGAAGTACTCAGCGCC |                                   |
|          | Mouse PHF2            | CTAGCAAAAACGTGGCTATTAAGTGTCTACTCGAGT<br>AGAACACTTTAATAGCCACGCC    |                                   |
|          | Rat PHF2-I            | AATTA AAAAGAAGAAAGGGAAGAAGTGCAACTCGAGT<br>TGCACTTCTTCCCTTTCTTC    |                                   |
|          | Rat PHF2-II           | AATTA AAAACAAAGAGCGTCCTGAGTGTTCCTCGAGG<br>AACACTCAGGACGCTCTTTG    |                                   |
| siRNAs   | Non-targeting control | AUGAACGUGAAUUGCUC AATT                                            |                                   |
|          | Mouse Suv39H1-I       | UCUUUCUAAGUCCUUGUG                                                |                                   |
|          | Mouse Suv39H1-II      | GUUGUCUAUGAAUACGUU                                                |                                   |
|          |                       | <b>Forward primers (5' to 3')</b>                                 | <b>Reverse primers (5' to 3')</b> |
| RT-qPCR  | Mouse ALP             | CCA ACTCTTTTGTGCCAG<br>AGA                                        | GGCTACATTGGTGTGAG<br>CTTTT        |
|          | Mouse OCN             | GCAATAAGGTAGTGAAC<br>AGACTCC                                      | GTTTGTAGGCGGTCTTCA<br>AGC         |
|          | Mouse BSP             | AAGCAGCACCGTTGAGT<br>ATGG                                         | CCTTGTAGTAGCTGTATTC<br>GTCCTC     |
| ChIP PCR | Proximal OCN promoter | CGTCCACTCCAGAGCCT<br>T (P2)                                       | CTCAGTGGGTCAAACCCA<br>AAG (P1)    |
|          | Distal OCN promoter   | CCCACAATGGGCTAGGCT<br>C (P4)                                      | TGCCTCCATAAGATCCGG<br>TT (P3)     |
